# Supplementary material for: Prostate-Specific Antigen Doubling Time Kinetics following Radical Prostatectomy to Guide Need for Treatment Intervention: Validation of Low-Risk Recurrences
Source: MDPI journal article supplement (doi:10.3390/cancers14174087), 2022-08-24
Supplement: s1 [file s1]

Supplementary Table S1: Univariate and multivariate regression analysis in BCR patients for NO PCSM.

| Outcome: PCSS                 |                                | Univariate Model     |         | Multivariate Model 1 |         | Multivariate Model 2 |         |
|-------------------------------|--------------------------------|----------------------|---------|----------------------|---------|----------------------|---------|
| Variable                      | References                     | Estimate OR (95% CI) | p-value | Estimate OR (95% CI) | p-value | Estimate OR (95% CI) | p-value |
| PSADT binary                  | >12mos vs <12mos [ref]         | 2.7 (0.55,13.3)      | 0.565   | 1.68 (0.32,8.75)     | 0.526   |                      |         |
| DT Pattern                    | Increasing vs Decreasing [ref] | 8.08 (0.99,65.72)    | 0.08    | 7.18(0.84,61.59)     | 0.028   | 9.72 (1.21,78.09)    | 0.006   |
| GGG                           | 4-5 vs 1-3 [ref]               | 0.96 (0.23,3.97)     | 0.59    |                      |         |                      |         |
| Preoperative PSA (continuous) |                                | 0.95 (0.88,1.03)     | 0.65    |                      |         |                      |         |
| P-stage                       | pT3/4 vs pT2 [ref]             | 0.37 (0.08,1.83)     | 0.259   | 0.4 (0.08,2.01)      | 0.232   |                      |         |
| Age (continuous)              |                                | 1.06 (0.96,1.17)     | 0.244   | 1.07 (0.96,1.18)     | 0.0202  | 1.08 (0.99,1.18)     | 0.092   |
